# Supplementary material
Source: PubMed Central journal article supplement (PMC10842190)
Supplement: NIHMS1943770-supplement-2.pdf [file NIHMS1943770-supplement-2.pdf]

## **ASSOCIATED CONTENT**

### **Supporting Information**

The supporting Information available: The following files are available free of charge. DOI: 10.1021/xxxx.xxxxxxx.

Experimental procedures, Scheme S1, and Figures S1–S13 (PDF)
